# Supplementary material for: Determination of licit and illicit drugs and metabolites in human sweat by liquid chromatography-tandem mass spectrometry
Source: Royal Society of Chemistry journal article supplement (doi:10.1039/d3ay00678f), 2023-01-01
Supplement: d3ay00678f1.pdf [file d3ay00678f1.pdf]

### Supplementary Material

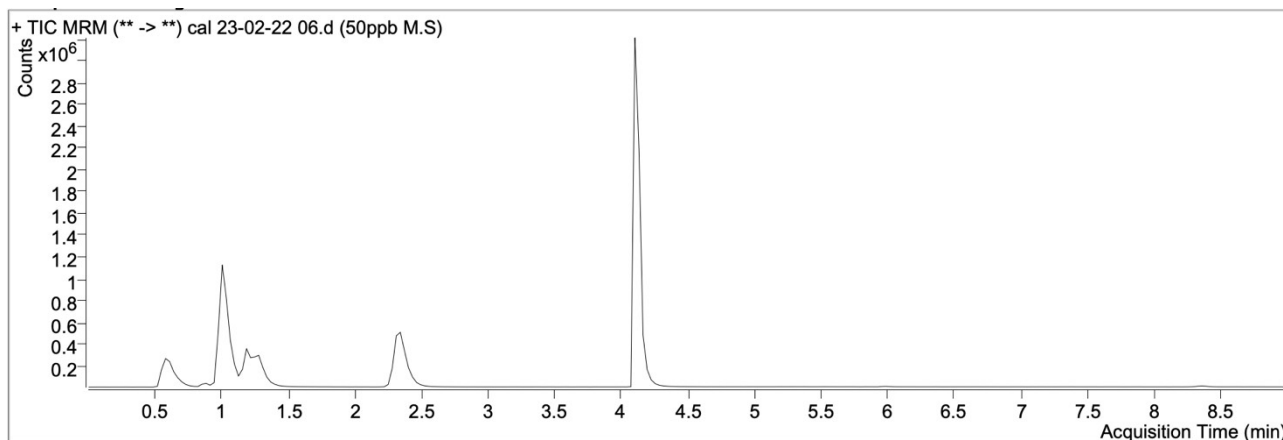

Fig. S1. LC/MS/MS chromatogram from 50 µg/L calibration standard.

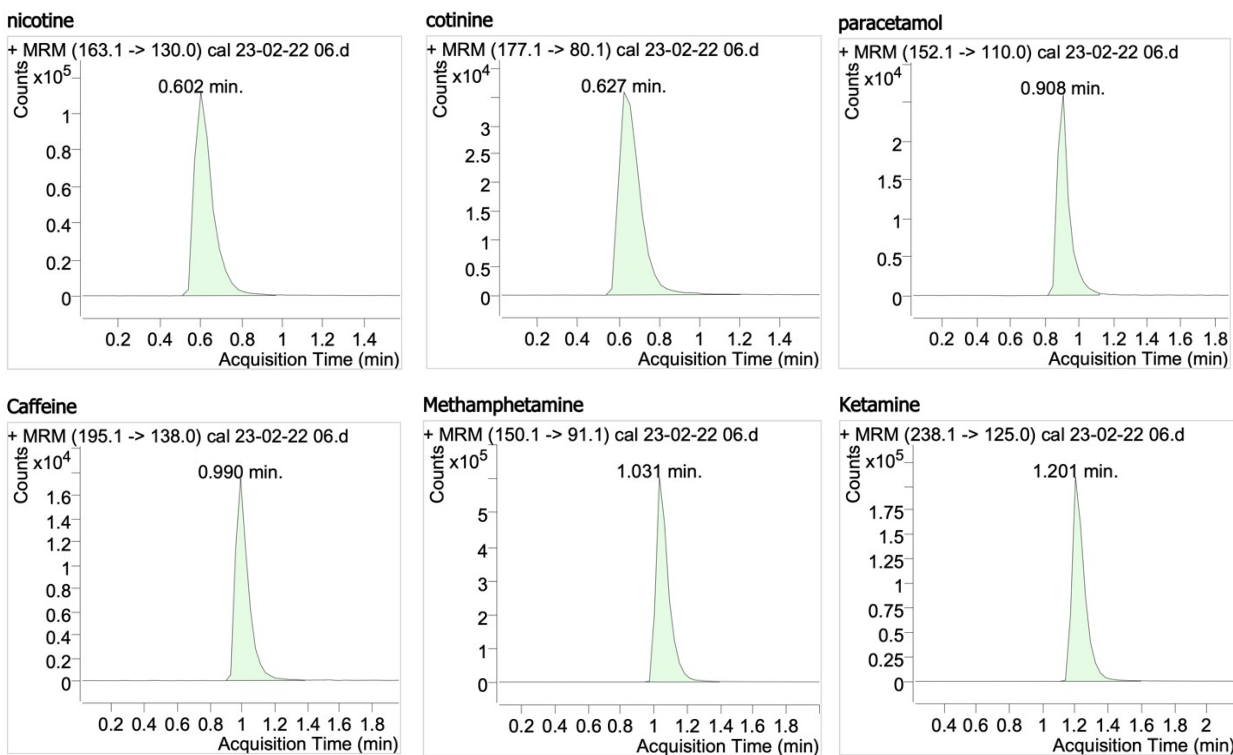

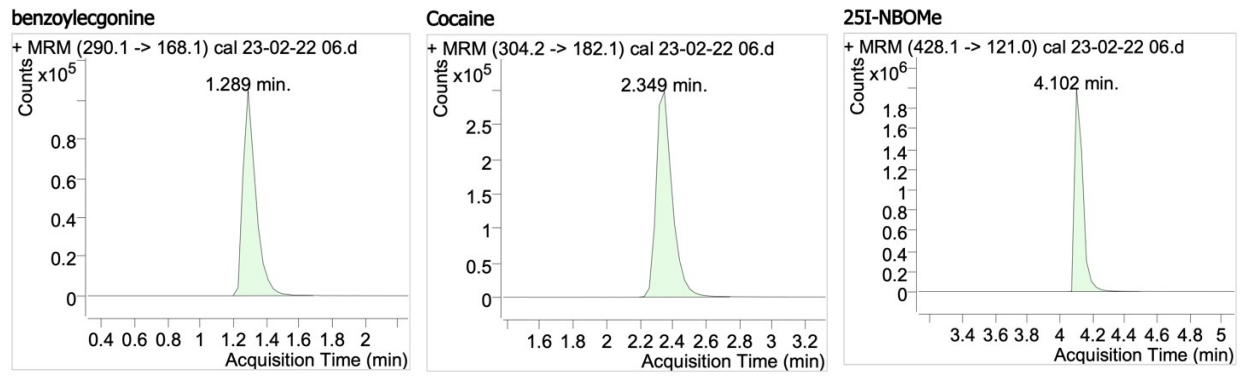

**Fig. S2.** Chromatograms of the nine target compounds (50 µg/L).

## Participant Questionnaire for Research Project

Type of project: POSTGRADUATE  
 Title of project: *Detection of Licit and Illicit Drugs in Sweat by Liquid Chromatography-Tandem Mass Spectrometry*  
 Name of researcher: Margaret Sotom  
 Name of supervisor: Kevin Honeychurch  
 Date: 01/01/2022

Date when filled out: .....

Participant number (*filled by researcher*): .....

Sex: Male  Female

|   | <i>Mark with X in box</i>                                                         | YES | NO | N/A |
|---|-----------------------------------------------------------------------------------|-----|----|-----|
| 1 | Are you between the age of 20-25 years old?                                       |     |    |     |
| 2 | Are you under any prescribed medication?                                          |     |    |     |
| 3 | Have you taken paracetamol <b>in the last week</b> ?                              |     |    |     |
| 4 | Have you drunk caffeinated coffee or tea <b>in the last week</b> ?                |     |    |     |
| 5 | If the answer above is yes, do you drink caffeinated drinks every day?            |     |    |     |
| 6 | Are you a regular smoker?                                                         |     |    |     |
| 7 | If no to the above question, have you smoked <b>cigarettes in the last week</b> ? |     |    |     |
| 8 | Have you ever consumed illicit drugs?                                             |     |    |     |

If you have answered yes to question 8, then please answer the questions below.

The illicit drugs involved in this research project are cocaine, ketamine, 25I-NBOMe, benzoylecgonine, methamphetamine and  $\Delta^9$ -Tetrahydrocannabinol and 11-nor-9-tetrahydrocannabinol (cannabis).

|    |                                                                           |        |                          |  |
|----|---------------------------------------------------------------------------|--------|--------------------------|--|
| 9  | Have you ever consumed any of the drugs listed above?                     |        |                          |  |
| 10 | Have you consumed any of the drugs listed above <b>in the last week</b> ? |        |                          |  |
| 11 | If so, when within the last week? (tick the relevant boxes)               | 1 day  | <input type="checkbox"/> |  |
|    |                                                                           | 2 days | <input type="checkbox"/> |  |
|    |                                                                           | 3 days | <input type="checkbox"/> |  |
|    |                                                                           | 4 days | <input type="checkbox"/> |  |
|    |                                                                           | 5 days | <input type="checkbox"/> |  |
|    |                                                                           | 6 days | <input type="checkbox"/> |  |
|    |                                                                           | 7 days | <input type="checkbox"/> |  |

**Fig. S3.** Blank questionnaire filled by all participants.
